# Supplementary material
Source: PubMed Central journal article supplement (PMC4806394)
Supplement: NIHMS764536-supplement-Supplemental.pdf [file NIHMS764536-supplement-Supplemental.pdf]

# Web-based Supplementary Materials for

A comparative study of adaptive dose-finding designs  
for phase I oncology trials of combination therapies

by A. HIRAKAWA, N.A. WAGES, H. SATO, AND S. MATSUI

## **Tables of main results**

Table 1: Summary of the operating characteristics of the 5 methods in all scenarios

| Method | Scenarios                                                     |    |    |    |    |    |    |    |    |    |     |    |    |    |    |    |           |
|--------|---------------------------------------------------------------|----|----|----|----|----|----|----|----|----|-----|----|----|----|----|----|-----------|
|        | 1                                                             | 2  | 3  | 4  | 5  | 6  | 7  | 8  | 9  | 10 | 11  | 12 | 13 | 14 | 15 | 16 | Average   |
|        | Recommendation rates for true MTD dose combinations (%)       |    |    |    |    |    |    |    |    |    |     |    |    |    |    |    |           |
| YYC    | 44                                                            | 70 | 26 | 6  | 59 | 44 | 33 | 5  | 39 | 49 | 72  | 2  | 30 | 18 | 37 | 2  | <b>34</b> |
| CDP    | 62                                                            | 81 | 25 | 29 | 80 | 43 | 46 | 23 | 53 | 41 | 92  | 38 | 51 | 39 | 34 | 22 | <b>47</b> |
| BW     | 50                                                            | 66 | 24 | 36 | 58 | 37 | 28 | 24 | 39 | 38 | 83  | 29 | 38 | 33 | 33 | 20 | <b>40</b> |
| WCO    | 56                                                            | 73 | 32 | 31 | 77 | 40 | 37 | 23 | 49 | 48 | 86  | 36 | 39 | 44 | 41 | 26 | <b>46</b> |
| HHM    | 45                                                            | 66 | 28 | 38 | 64 | 49 | 31 | 29 | 47 | 46 | 70  | 22 | 30 | 44 | 42 | 20 | <b>42</b> |
|        | Recommendation rates for overdose combinations (%)            |    |    |    |    |    |    |    |    |    |     |    |    |    |    |    |           |
| YYC    | 23                                                            | 23 | 54 | 70 | 27 | 32 | 42 | 55 | 26 | 40 | n/a | 47 | 25 | 41 | 49 | 54 | <b>41</b> |
| CDP    | 24                                                            | 18 | 54 | 36 | 10 | 41 | 20 | 39 | 10 | 34 | n/a | 25 | 26 | 37 | 47 | 32 | <b>30</b> |
| BW     | 27                                                            | 24 | 48 | 37 | 17 | 39 | 25 | 41 | 26 | 39 | n/a | 32 | 28 | 37 | 43 | 35 | <b>33</b> |
| WCO    | 24                                                            | 24 | 55 | 44 | 13 | 36 | 29 | 46 | 20 | 29 | n/a | 36 | 19 | 32 | 34 | 34 | <b>32</b> |
| HHM    | 14                                                            | 23 | 48 | 36 | 12 | 22 | 22 | 32 | 12 | 19 | n/a | 29 | 15 | 31 | 24 | 32 | <b>25</b> |
|        | Average number of patients allocated to true MTD combinations |    |    |    |    |    |    |    |    |    |     |    |    |    |    |    |           |
| YYC    | 8                                                             | 14 | 6  | 1  | 12 | 9  | 5  | 1  | 6  | 10 | 10  | 1  | 6  | 4  | 8  | 0  | <b>6</b>  |
| CDP    | 14                                                            | 17 | 5  | 6  | 17 | 9  | 11 | 5  | 12 | 10 | 24  | 8  | 11 | 8  | 8  | 5  | <b>11</b> |
| BW     | 11                                                            | 14 | 5  | 9  | 12 | 8  | 6  | 6  | 10 | 8  | 23  | 5  | 8  | 8  | 6  | 4  | <b>9</b>  |
| WCO    | 14                                                            | 16 | 7  | 7  | 16 | 10 | 7  | 5  | 11 | 12 | 21  | 8  | 8  | 10 | 9  | 5  | <b>10</b> |
| HHM    | 11                                                            | 14 | 6  | 6  | 9  | 8  | 3  | 5  | 8  | 9  | 15  | 5  | 5  | 7  | 7  | 3  | <b>8</b>  |

Table 2: Summary of the operating characteristics of the 5 methods in all scenarios

|     |      | Scenarios                                                                          |      |      |      |      |      |      |      |      |      |      |      |      |      |      |             |
|-----|------|------------------------------------------------------------------------------------|------|------|------|------|------|------|------|------|------|------|------|------|------|------|-------------|
|     |      | Overall percentage of observed toxicities (%)                                      |      |      |      |      |      |      |      |      |      |      |      |      |      |      |             |
| YYC | 22   | 27                                                                                 | 25   | 22   | 24   | 24   | 24   | 25   | 18   | 24   | 20   | 26   | 22   | 26   | 24   | 22   | <b>23</b>   |
| CDP | 31   | 39                                                                                 | 36   | 28   | 32   | 34   | 31   | 34   | 25   | 31   | 27   | 35   | 31   | 35   | 31   | 30   | <b>32</b>   |
| BW  | 30   | 34                                                                                 | 32   | 29   | 31   | 31   | 29   | 31   | 27   | 31   | 27   | 33   | 31   | 32   | 30   | 30   | <b>30</b>   |
| WCO | 28   | 35                                                                                 | 33   | 27   | 26   | 27   | 23   | 28   | 25   | 29   | 26   | 32   | 26   | 28   | 26   | 24   | <b>28</b>   |
| HHM | 22   | 33                                                                                 | 28   | 19   | 15   | 18   | 15   | 19   | 17   | 24   | 21   | 29   | 18   | 20   | 17   | 13   | <b>20</b>   |
|     |      | Average number of patients allocated to at a dose combination above the true MTDCs |      |      |      |      |      |      |      |      |      |      |      |      |      |      |             |
| YYC | 3    | 6                                                                                  | 11   | 11   | 6    | 5    | 9    | 10   | 3    | 9    | n/a  | 9    | 4    | 10   | 9    | 9    | <b>8</b>    |
| CDP | 10   | 11                                                                                 | 18   | 12   | 7    | 15   | 9    | 15   | 4    | 12   | n/a  | 12   | 10   | 14   | 15   | 12   | <b>12</b>   |
| BW  | 9    | 10                                                                                 | 15   | 11   | 8    | 12   | 9    | 12   | 8    | 12   | n/a  | 12   | 10   | 13   | 14   | 12   | <b>11</b>   |
| WCO | 7    | 9                                                                                  | 16   | 11   | 4    | 9    | 6    | 12   | 5    | 9    | n/a  | 11   | 6    | 9    | 9    | 8    | <b>9</b>    |
| HHM | 3    | 11                                                                                 | 14   | 7    | 0    | 3    | 3    | 6    | 2    | 6    | n/a  | 9    | 1    | 5    | 3    | 2    | <b>5</b>    |
|     |      | Accuracy Index                                                                     |      |      |      |      |      |      |      |      |      |      |      |      |      |      |             |
| YYC | 0.4  | 0.72                                                                               | 0.47 | 0.31 | 0.58 | 0.45 | 0.46 | 0.3  | 0.43 | 0.54 | 0.37 | 0.36 | 0.5  | 0.42 | 0.58 | 0.34 | <b>0.45</b> |
| CDP | 0.56 | 0.82                                                                               | 0.49 | 0.48 | 0.78 | 0.56 | 0.66 | 0.53 | 0.60 | 0.53 | 0.56 | 0.60 | 0.67 | 0.56 | 0.55 | 0.53 | <b>0.59</b> |
| BW  | 0.37 | 0.71                                                                               | 0.47 | 0.49 | 0.55 | 0.49 | 0.46 | 0.51 | 0.42 | 0.39 | 0.4  | 0.54 | 0.5  | 0.45 | 0.48 | 0.47 | <b>0.48</b> |
| WCO | 0.46 | 0.76                                                                               | 0.58 | 0.5  | 0.74 | 0.53 | 0.6  | 0.51 | 0.55 | 0.59 | 0.47 | 0.64 | 0.61 | 0.57 | 0.58 | 0.53 | <b>0.57</b> |
| HHM | 0.31 | 0.69                                                                               | 0.49 | 0.54 | 0.62 | 0.62 | 0.56 | 0.58 | 0.54 | 0.52 | 0.37 | 0.56 | 0.48 | 0.56 | 0.5  | 0.4  | <b>0.52</b> |

## Additional scenarios with ‘imperfect’ MTDC

We also compared the operating characteristics among the 5 methods under 6 scenarios with  $3 \times 3$ ,  $4 \times 4$ , and  $3 \times 4$  dose combination matrices with “imperfect” MTDC’s, as shown in Table 3. By ‘imperfect’ we mean that there is no combination with DLT rate exactly equal to the target rate  $\phi$ . In these cases, selecting combinations, as the MTDC, with DLT rates that are within a certain range would be considered acceptable. Table 3 highlights any combination with a DLT rate within 0.05 of the target and we deem them “acceptable” if chosen as the MTDC. Under each scenario, 1000 trials were simulated. The target toxicity probability is set to  $\phi = 0.30$  in Scenarios 1 and 2,  $\phi = 0.33$  in Scenarios 3–6. The sample size is  $n = 22$  in Scenarios 1 and 2,  $n = 32$  in Scenarios 3 and 4, and  $n = 36$  in Scenarios 5 and 6.

For the YYC method, we assumed  $\text{gamma}(2, 2)$  as the prior distribution for  $\alpha$  and  $\beta$ , and  $\text{gamma}(0.1, 0.1)$  as the prior distribution for  $\gamma$ . The values of the marginal a priori DLT rates,  $p_j$ , are set to  $(0.10, 0.20, 0.30)$  for  $J = 3$ , and  $(0.10, 0.20, 0.30, 0.40)$  for  $J = 4$ , respectively. The same settings are made for  $q_k$ . The fixed probability cut-offs for dose escalation and de-escalation are  $c_e = 0.80$  and  $c_d = 0.45$ , respectively, which are also default values used by the software. For the BW method, the variance parameter  $\sigma^2$  is set to 3 in order to stabilize the implementation of the R package **rjags**. The prior probability of each dose combination is shown in Table 4. For the WCO method, we chose a subset of possible dose-toxicity orders based on ordering the combinations by rows, columns, and diagonals of the drug combination matrix, as suggested by Wages and Conaway [1]. We utilized eight possible orderings in all scenarios. A uniform prior,  $\tau(m)$ , was placed on the orderings. The skeleton values,  $p_{jk}(m)$ , were generated according to the algorithm of Lee and Cheung [2] using the **getprior** function in R package **dfcrm** [3]. Specifically, for  $3 \times 3$  combinations, we used **getprior(0.05,0.30,4,9)**; for  $4 \times 4$  combinations, we used **getprior(0.05,0.30,7,16)**; and for  $3 \times 4$  combinations, we used **getprior(0.05,0.30,6,12)**. The location of these skeleton values was adjusted to correspond to each of the six orderings using the **getwm** function in R package **pocrm**. All simulation results were carried out using the functions of **pocrm** with a cohort size of 1 in both stages. For each simulated trial, no stopping rule was specified so as to exhaust the pre-specified maximum sample sizes above. We performed the HHM method using the SAS/IML in SAS 9.3 (SAS Institute Inc., NC). The fixed intercept  $\beta_0$  is set to be  $-3$  throughout.  $c_1$  and  $c_2$  are commonly set to 0.05. We set  $x_1 = 1, 2, 3$  and  $x_2 = 1, 2, 3$  for  $3 \times 3$  dose combinations,  $x_1 = 1, 2, 3, 4$  and  $x_2 = 1, 2, 3, 4$  for  $4 \times 4$  dose combinations, and  $x_1 = 1, 2, 3$  and  $x_2 = 1, 2, 3, 4$  for  $3 \times 4$  dose combinations, respectively.

Overall, the results in Table 5 seem to be consistent with the results in the main paper. The WCO (37.1%) and CDP (38.3%) methods again yielded the highest average recommendation rates for MTDC’s around the target rate by at least 6% over the nearest competitor (YYC; 31.5%). These gains appear to be more substantial than in the cases in which there is a “perfect” MTDC, however this is based on a small set of six scenarios.

Table 3: Six scenarios for two-agent combination trials with an “imperfect” MTDC. Combinations with true DLT probabilities within 5% of the target rate ( $\phi$ ) are considered acceptable and are indicated in bold type.

|   |   | A           |             |             |             |             |             |             |             | Target          | Sample |
|---|---|-------------|-------------|-------------|-------------|-------------|-------------|-------------|-------------|-----------------|--------|
|   |   | 1           | 2           | 3           | 4           | 1           | 2           | 3           | 4           | Rate ( $\phi$ ) | Size   |
|   |   | Scenario 1  |             |             |             | Scenario 2  |             |             |             | 0.30            | 22     |
|   | 3 | 0.20        | 0.50        | 0.66        |             | 0.18        | 0.50        | 0.60        |             |                 |        |
|   | 2 | 0.06        | <b>0.33</b> | 0.50        |             | 0.12        | 0.18        | 0.50        |             |                 |        |
|   | 1 | 0.02        | 0.20        | <b>0.33</b> |             | 0.06        | 0.12        | <b>0.33</b> |             |                 |        |
|   |   | Scenario 3  |             |             |             | Scenario 4  |             |             |             |                 |        |
|   | 4 | <b>0.35</b> | 0.40        | 0.42        | 0.45        | 0.43        | 0.65        | 0.79        | 0.95        | 0.33            | 32     |
| B | 3 | 0.28        | <b>0.31</b> | <b>0.35</b> | <b>0.36</b> | <b>0.35</b> | 0.51        | 0.75        | 0.91        |                 |        |
|   | 2 | 0.15        | 0.19        | 0.23        | <b>0.30</b> | 0.20        | 0.39        | 0.63        | 0.88        |                 |        |
|   | 1 | 0.05        | 0.09        | 0.20        | 0.25        | 0.05        | 0.25        | 0.50        | 0.80        |                 |        |
|   |   | Scenario 5  |             |             |             | Scenario 6  |             |             |             |                 |        |
|   | 3 | 0.30        | 0.40        | 0.50        | 0.60        | 0.40        | 0.68        | 0.80        | 0.99        | 0.33            | 36     |
|   | 2 | 0.05        | 0.15        | 0.25        | <b>0.35</b> | 0.20        | <b>0.35</b> | 0.50        | 0.70        |                 |        |
|   | 1 | 0.01        | 0.10        | 0.15        | 0.20        | 0.01        | 0.10        | 0.20        | <b>0.30</b> |                 |        |

Table 4: Prior toxicity probabilities we used in the simulation studies in the BW method in additional simulations with an ‘imperfect’ MTDC.

|   |      | A     |      |      |   |       |      |      |      |
|---|------|-------|------|------|---|-------|------|------|------|
|   |      | 1     | 2    | 3    | 4 | 1     | 2    | 3    | 4    |
|   |      | 3 × 3 |      |      |   | 4 × 4 |      |      |      |
| 4 |      |       |      |      |   | 0.33  | 0.42 | 0.50 | 0.60 |
| 3 | 0.30 | 0.40  | 0.50 |      |   | 0.22  | 0.33 | 0.42 | 0.50 |
| 2 | 0.20 | 0.30  | 0.40 |      |   | 0.11  | 0.22 | 0.33 | 0.42 |
| 1 | 0.10 | 0.20  | 0.30 |      |   | 0.02  | 0.11 | 0.22 | 0.33 |
| B |      |       |      |      |   |       |      |      |      |
|   |      | 3 × 4 |      |      |   |       |      |      |      |
| 3 | 0.33 | 0.40  | 0.47 | 0.54 |   |       |      |      |      |
| 2 | 0.22 | 0.29  | 0.36 | 0.43 |   |       |      |      |      |
| 1 | 0.10 | 0.17  | 0.25 | 0.33 |   |       |      |      |      |

Table 5: Summary of the operating characteristics of the 5 methods in 6 scenarios containing an “imperfect” MTDC. The table reports the percentage of simulated trials that each method selected, as the MTDC, an acceptable combination, defined as one with true DLT rate within 0.05 of the target rate  $\phi$ .

| Method                                                     | Scenarios |      |      |      |      |      | Avg.        |
|------------------------------------------------------------|-----------|------|------|------|------|------|-------------|
|                                                            | 1         | 2    | 3    | 4    | 5    | 6    |             |
| Recommendation rates (%) for<br>combos within 5% of $\phi$ |           |      |      |      |      |      |             |
| YYC                                                        | 37.2      | 23.0 | 43.0 | 18.1 | 29.6 | 41.1 | <b>31.5</b> |
| CDP                                                        | 47.7      | 29.9 | 49.5 | 24.7 | 29.4 | 47.6 | <b>38.3</b> |
| BW                                                         | 22.5      | 10.5 | 17.1 | 2.9  | 12.6 | 11.5 | <b>13.8</b> |
| WCO                                                        | 46.4      | 23.4 | 48.3 | 22.3 | 36.5 | 50.2 | <b>37.1</b> |
| HHM                                                        | 30.5      | 7.3  | 26.9 | 11.4 | 27.9 | 37.5 | <b>22.4</b> |

## References

- [1] Wages NA, Conaway MR. Specifications of a continual reassessment method design for phase I trials of combined drugs. *Pharmaceutical Statistics* 2013; **12**:217–224.
- [2] Lee SM, Cheung YK. Model calibration in the continual reassessment method. *Clinical Trials* 2009; **6**:227–238.
- [3] Wages NA, Varhegyi N. pocrm: an R-package for phase I trials of combinations of agents. *Computer Methods and Programs in Biomedicine* 2013; **112**: 211–218.
